# Supplementary material
Source: PubMed Central journal article supplement (PMC9772066)
Supplement: NIHMS1854378-supplement-1.pdf [file NIHMS1854378-supplement-1.pdf]

**Supplemental Table 1:** Outcomes data of our study cohort (n=55) based on their birth weights.

|                            |                          | Birth weight    |                       |                   |
|----------------------------|--------------------------|-----------------|-----------------------|-------------------|
|                            |                          | ≤ 1500 g (n=26) | 1501 to 2500 g (n=25) | 2501-3500 g (n=4) |
| Bronchopulmonary Dysplasia |                          |                 |                       |                   |
|                            | Our study Cohort – n (%) | 10 (38.5)       | 0 (0)                 | 0 (0)             |
| Necrotizing Enterocolitis  |                          |                 |                       |                   |
|                            | Our study cohort – n (%) | 3 (11.5)        | 1 (4.0)               | 0 (0)             |
| Sepsis                     |                          |                 |                       |                   |
|                            | Our study cohort – n (%) | 6 (23.1)        | 0 (0)                 | 0 (0)             |
| Mortality                  |                          |                 |                       |                   |
|                            | Our study cohort – n (%) | 1 (3.8)         | 0 (0)                 | 0 (0)             |

**Supplemental Table 2:** The distribution of GDF15 levels within the first week of life in the study cohort. Two sample t-test showed a significant association between gestational age and the initial GDF15 levels, and no significant association between the initial GDF15 levels and birth weight or sex.

|                                                                                                                                         |                    | GDF15 levels within the first week of life, (pg/mL) |        |         |         |
|-----------------------------------------------------------------------------------------------------------------------------------------|--------------------|-----------------------------------------------------|--------|---------|---------|
|                                                                                                                                         |                    | Mean ± SD                                           | Min    | Max     | p-value |
| <b>All subjects (n = 52)<sup>a</sup></b>                                                                                                |                    | 4856.4 ± 3329.5                                     | 1217.5 | 15738.3 |         |
| <b>Infants Characteristics</b>                                                                                                          |                    |                                                     |        |         |         |
| <b>Gestational Age</b>                                                                                                                  |                    |                                                     |        |         |         |
|                                                                                                                                         | 23-30 weeks (n=17) | 7201.1 ± 3880.4                                     | 2278.1 | 15738.3 | <0.001  |
|                                                                                                                                         | 31-36 weeks (n=35) | 3717.5 ± 2336.4                                     | 1217.5 | 11119.5 |         |
| <b>Birth weight</b>                                                                                                                     |                    |                                                     |        |         |         |
|                                                                                                                                         | < 2000 g (n=37)    | 5390.5 ± 3693.8                                     | 1217.5 | 15738.3 | 0.069   |
|                                                                                                                                         | ≥ 2000 g (n=15)    | 3538.8 ± 1638.6                                     | 1253.9 | 6713.8  |         |
| <b>Gender</b>                                                                                                                           |                    |                                                     |        |         |         |
|                                                                                                                                         | Female (n=22)      | 4622.2 ± 3364.3                                     | 1217.5 | 15738.3 | 0.669   |
|                                                                                                                                         | Male (n=30)        | 5028.0 ± 3350.7                                     | 1253.9 | 15738.3 |         |
| <sup>a</sup> Five subjects out of the 57 were excluded, due to inability to retrieve scavenged specimens within the first week of life. |                    |                                                     |        |         |         |

| <b>Supplemental Table 3: The serum GDF15 levels at different postmenstrual ages</b> |                                                          |                        |                        |                        |                        |
|-------------------------------------------------------------------------------------|----------------------------------------------------------|------------------------|------------------------|------------------------|------------------------|
|                                                                                     | <b>GDF15 levels at different postnatal ages, (pg/mL)</b> |                        |                        |                        |                        |
|                                                                                     | PMA <sup>a</sup> 23-25                                   | PMA <sup>a</sup> 26-28 | PMA <sup>a</sup> 29-31 | PMA <sup>a</sup> 32-34 | PMA <sup>a</sup> 35-36 |
| <b>Mean ± SD</b>                                                                    | 8747 ± 3978                                              | 7073 ± 3748            | 5203 ± 3281            | 2864 ± 1863            | 2033 ± 1052            |
| <b>Minimum</b>                                                                      | 3405                                                     | 2278                   | 1956                   | 1090                   | 807.2                  |
| <b>Maximum</b>                                                                      | 15738                                                    | 15738                  | 15738                  | 9953                   | 4396                   |
| <sup>a</sup> PMA: Postmenstrual age in weeks                                        |                                                          |                        |                        |                        |                        |
